# Supplementary material
Source: MDPI journal article supplement (https://www.mdpi.com/2073-4441/15/12/2287)
Supplement: s1 [file s1]

## Supplementary

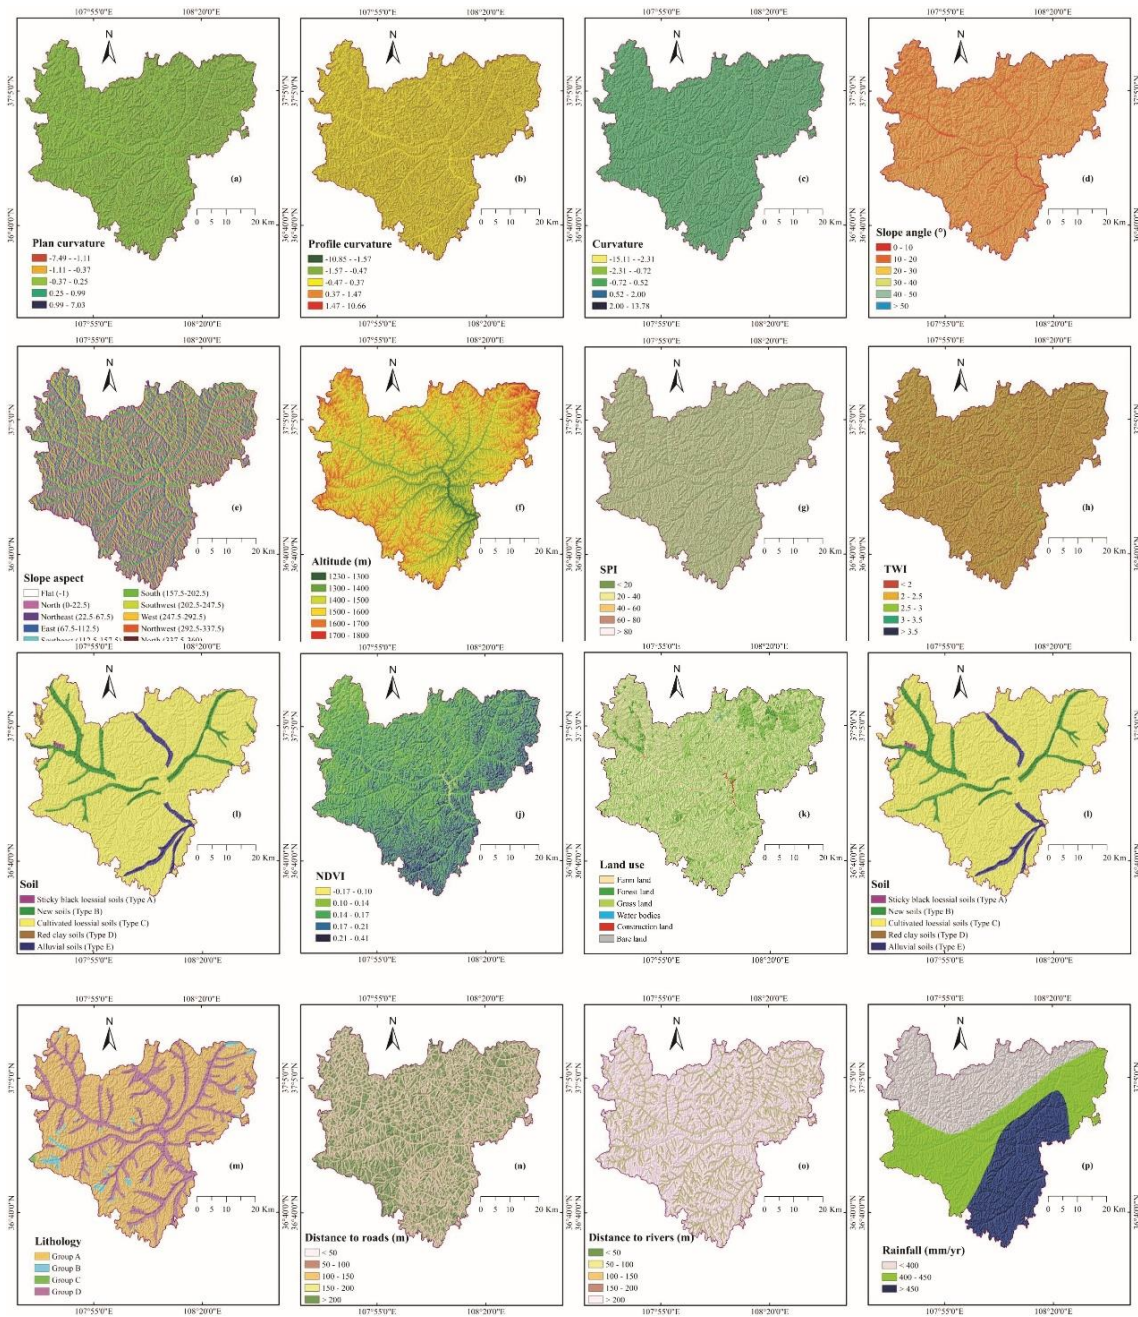

Figure S1.Spring conditioning factors

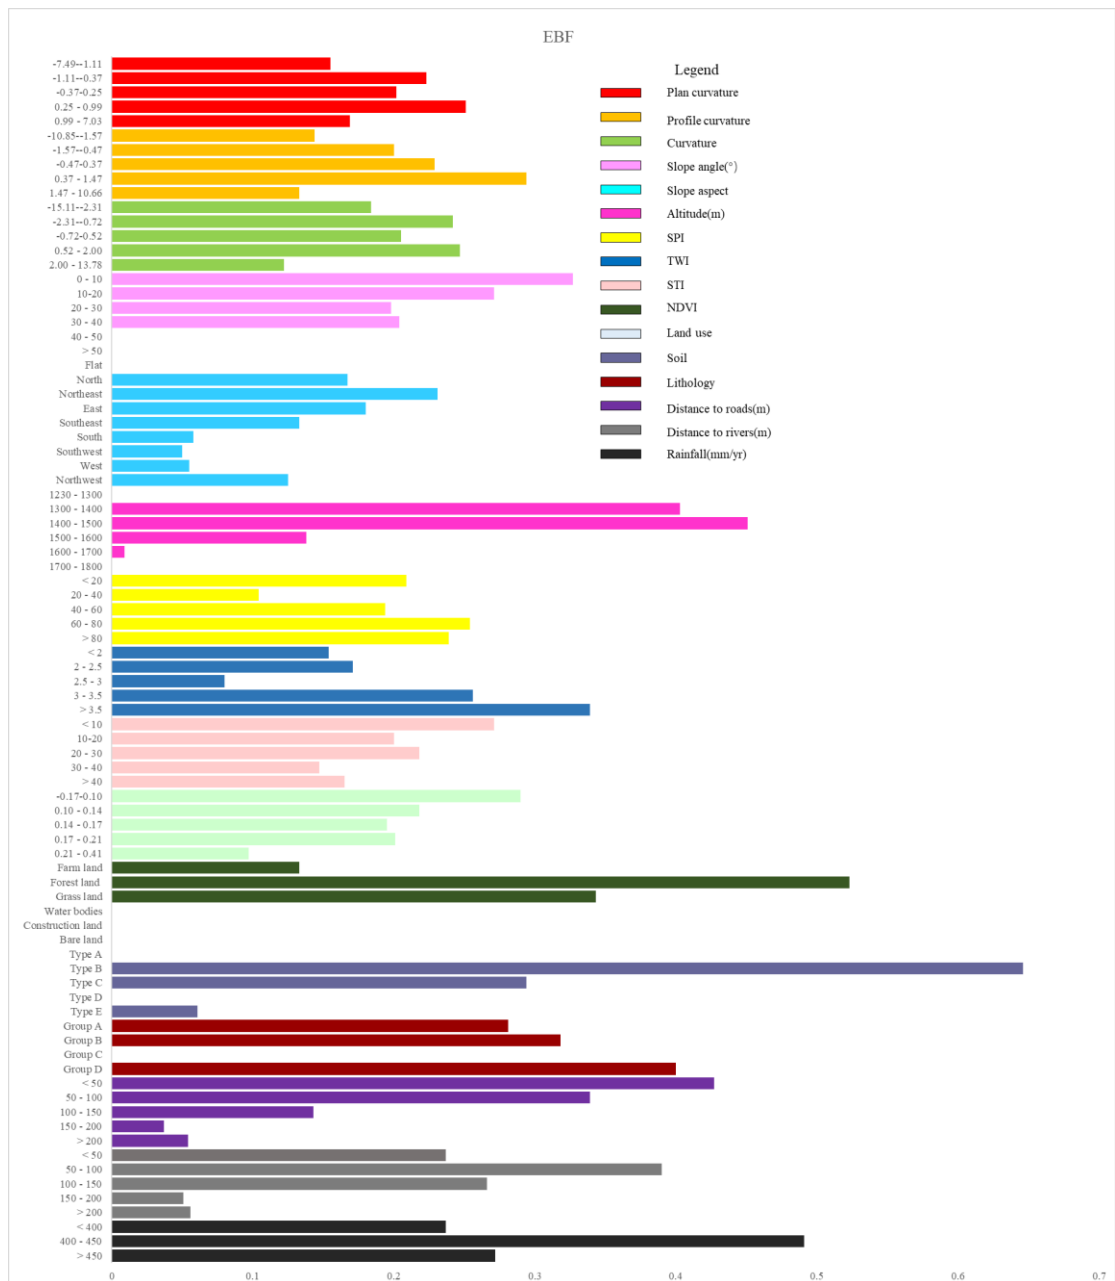

**Figure S2.** Conditioning factor histogram based on EBF

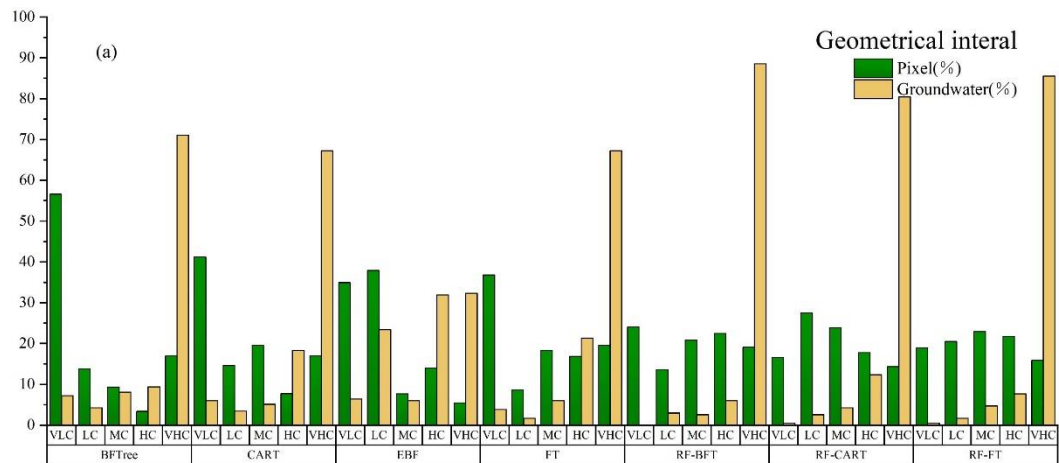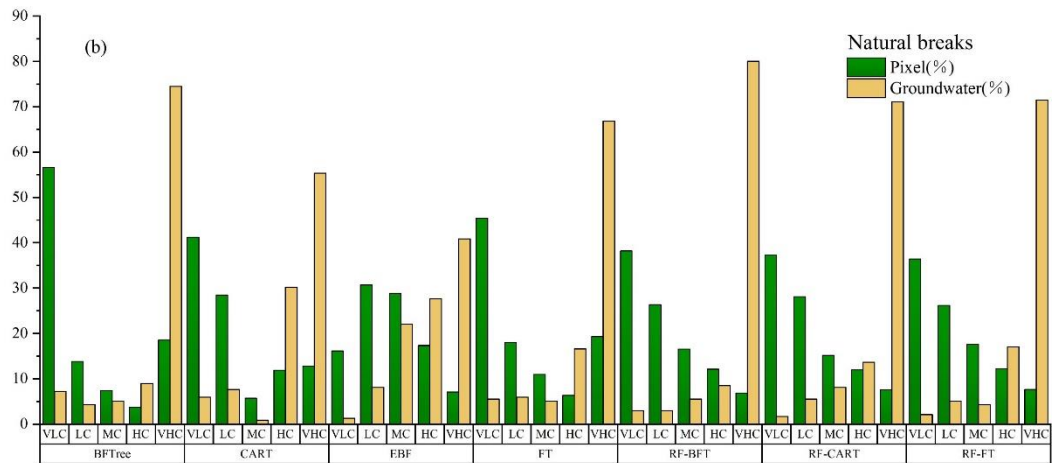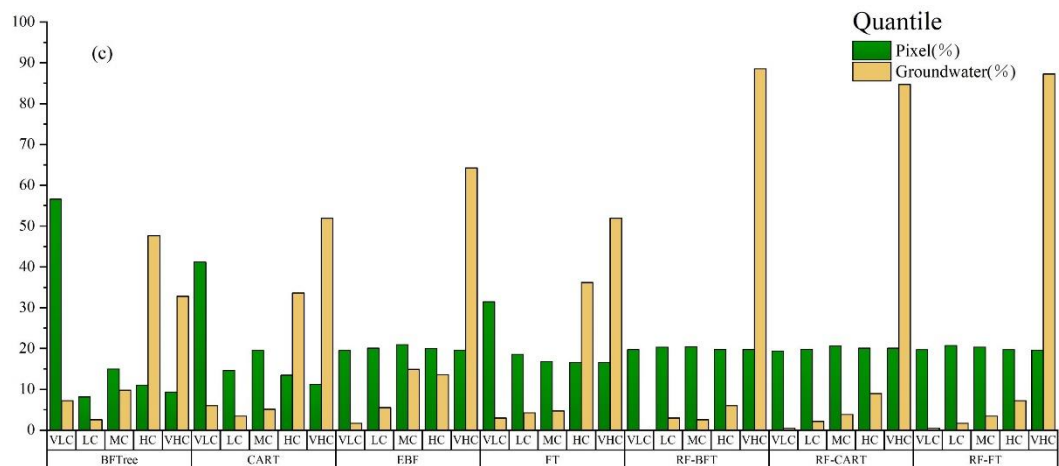

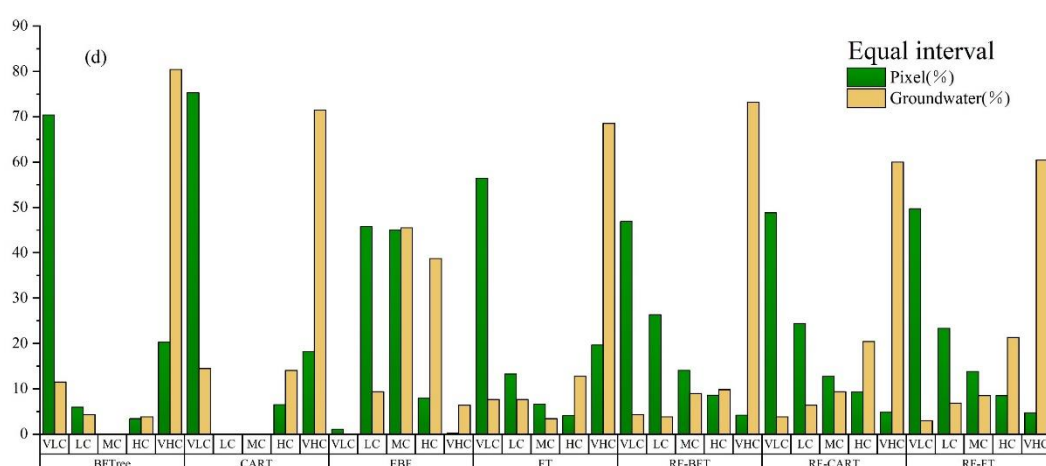

**Figure S3.** Selection of the best classification method for groundwater potential map:(a) geometrical interval, (b) natural breaks, (c) quantile, (d) equal interval.

**Table S1.** Performance of models using cutoff-dependent metrics

| Metrics     | BFT   | RFBFT | EBF   | CART  | RFCART | FT    | RFFT  |
|-------------|-------|-------|-------|-------|--------|-------|-------|
| TP          | 128   | 138   | 118   | 130   | 137    | 132   | 138   |
| TN          | 119   | 134   | 125   | 111   | 140    | 122   | 135   |
| FP          | 46    | 31    | 40    | 54    | 25     | 43    | 30    |
| FN          | 37    | 27    | 47    | 35    | 28     | 33    | 27    |
| Sensitivity | 0.776 | 0.836 | 0.715 | 0.788 | 0.830  | 0.800 | 0.836 |
| Specificity | 0.721 | 0.812 | 0.758 | 0.673 | 0.848  | 0.739 | 0.818 |
| Accuracy    | 0.748 | 0.824 | 0.736 | 0.730 | 0.839  | 0.770 | 0.827 |
| F-score     | 0.748 | 0.824 | 0.731 | 0.729 | 0.839  | 0.769 | 0.827 |
| MCC         | 0.498 | 0.649 | 0.473 | 0.464 | 0.679  | 0.540 | 0.655 |
| TSS         | 0.497 | 0.648 | 0.473 | 0.461 | 0.678  | 0.539 | 0.654 |

**Table S2.** Validation of models using cutoff-dependent metrics

| Metrics     | BFT   | RFBFT | EBF   | CART  | RFCART | FT    | RFFT  |
|-------------|-------|-------|-------|-------|--------|-------|-------|
| TP          | 44    | 48    | 40    | 45    | 48     | 47    | 49    |
| TN          | 44    | 56    | 53    | 42    | 55     | 45    | 55    |
| FP          | 26    | 14    | 17    | 28    | 15     | 25    | 15    |
| FN          | 26    | 22    | 30    | 25    | 22     | 23    | 21    |
| Sensitivity | 0.629 | 0.686 | 0.571 | 0.643 | 0.686  | 0.671 | 0.700 |
| Specificity | 0.629 | 0.800 | 0.757 | 0.600 | 0.786  | 0.643 | 0.786 |
| Accuracy    | 0.629 | 0.743 | 0.664 | 0.621 | 0.736  | 0.657 | 0.743 |
| F-score     | 0.629 | 0.742 | 0.630 | 0.621 | 0.735  | 0.657 | 0.742 |
| MCC         | 0.257 | 0.489 | 0.334 | 0.243 | 0.474  | 0.314 | 0.488 |
| TSS         | 0.258 | 0.486 | 0.329 | 0.243 | 0.472  | 0.314 | 0.486 |
